# Supplementary material for: Asparagus cochinchinensis Extract Alleviates Metal Ion‐Induced Gut Injury in Drosophila: An In Silico Analysis of Potential Active Constituents
Source: Hindawi journal article supplement (doi:10.1155/2016/7603746), 2016-01-01
Supplement: f1 [file 7603746.f1.pdf]

Table S1 The list of NPs screened from PharmMapper server.

| No. | UNPD ID    | Chemical_Name                                                                        | CAS_NO.                 | PubChem CID |
|-----|------------|--------------------------------------------------------------------------------------|-------------------------|-------------|
| 1   | UNPD133185 | Coniferyl alcohol                                                                    | 32811-40-8 458-35-5     | 1549095     |
| 2   | UNPD27847  | Pseudoprotodioscinbeta                                                               | 102115-79-7 117557-44-5 | N/A         |
| 3   | UNPD36432  | Pseudoprotodioscin                                                                   | 102115-79-7             | N/A         |
| 4   | UNPD43533  | Nyasol                                                                               | 230292-85-0             | 6438674     |
| 5   | UNPD60722  | (25S)-5beta-spirostan-3beta-yl-O-[O-alpha-L-rhamnosyl (1->4)]-beta-D-glucopyranoside | 58881-26-8              | N/A         |
| 6   | UNPD77220  | Asparenydiol                                                                         | 166762-98-7             | 10084256    |
| 7   | UNPD11158  | Asparacoside                                                                         | N/A                     | 21575006    |
| 8   | UNPD126821 | Pseudoprotodioscin                                                                   | N/A                     | N/A         |
| 9   | UNPD130293 | Asp-VI                                                                               | N/A                     | N/A         |
| 10  | UNPD135865 | 3'-Hydroxy-4'-methoxy-4'-dehydroxynyasol                                             | N/A                     | 21575014    |
| 11  | UNPD136991 | Asparacosin A                                                                        | N/A                     | 11385250    |
| 12  | UNPD14125  | Asparacoside                                                                         | N/A                     | 21575006    |
| 13  | UNPD143968 | 1,3-bis(4-hydroxyphenyl)pent-4-en-1-one                                              | N/A                     | N/A         |
| 14  | UNPD174302 | Asparacosin B                                                                        | N/A                     | 21575013    |
| 15  | UNPD206348 | Aspachioside C                                                                       | N/A                     | N/A         |
| 16  | UNPD206349 | Aspachioside D                                                                       | N/A                     | N/A         |
| 17  | UNPD68648  | 3''-Methoxyasparenydiol                                                              | N/A                     | N/A         |
| 18  | UNPD96599  | 3''-Methoxynyasol                                                                    | N/A                     | 25218067    |
| 19  | UNPD96816  | Asp-V                                                                                | N/A                     | N/A         |

Table S2 The list of FDA approved intestinal anti-inflammatory agents.

| No. | Drug name        | Drug ID | CAS NO.    | Molecular Formula                                               | Molecular Weight | ALogP | Num H Acceptors | Num H Donors | Num Rotatable Bonds | Num Rings |
|-----|------------------|---------|------------|-----------------------------------------------------------------|------------------|-------|-----------------|--------------|---------------------|-----------|
| 1   | Sulfasalazine    | DB00795 | 599-79-1   | C <sub>18</sub> H <sub>14</sub> N <sub>4</sub> O <sub>5</sub> S | 398.393          | 2.92  | 8               | 3            | 5                   | 3         |
| 2   | Balsalazide      | DB01014 | 80573-04-2 | C <sub>17</sub> H <sub>15</sub> N <sub>3</sub> O <sub>6</sub>   | 357.3175         | 3.37  | 8               | 4            | 7                   | 2         |
| 3   | Olsalazine       | DB01250 | 15722-48-2 | C <sub>14</sub> H <sub>10</sub> N <sub>2</sub> O <sub>6</sub>   | 302.239          | 2.77  | 8               | 4            | 4                   | 2         |
| 4   | Mesalazine       | DB00244 | 89-57-6    | C <sub>7</sub> H <sub>7</sub> NO <sub>3</sub>                   | 153.1354         | 0.75  | 4               | 3            | 1                   | 1         |
| 5   | Cromoglicic Acid | DB01003 | 16110-51-3 | C <sub>23</sub> H <sub>16</sub> O <sub>11</sub>                 | 468.3665         | 1.84  | 11              | 3            | 8                   | 4         |
| 6   | Prednisone       | DB00635 | 1953-3-2   | C <sub>21</sub> H <sub>26</sub> O <sub>5</sub>                  | 358.4281         | 2.07  | 5               | 2            | 2                   | 4         |
| 7   | Beclomethasone   | DB00394 | 5534-9-8   | C <sub>28</sub> H <sub>37</sub> ClO <sub>7</sub>                | 521.042          | 3.69  | 5               | 1            | 8                   | 4         |
| 8   | Budesonide       | DB01222 | 51333-22-3 | C <sub>25</sub> H <sub>34</sub> O <sub>6</sub>                  | 430.5339         | 2.42  | 6               | 2            | 4                   | 5         |
| 9   | Prednisolone     | DB00860 | 50-24-8    | C <sub>21</sub> H <sub>28</sub> O <sub>5</sub>                  | 360.444          | 1.66  | 5               | 3            | 2                   | 4         |
| 10  | Betamethasone    | DB00443 | 378-44-9   | C <sub>22</sub> H <sub>29</sub> FO <sub>5</sub>                 | 392.4611         | 1.93  | 5               | 3            | 2                   | 4         |
| 11  | Hydrocortisone   | DB00741 | 50-23-7    | C <sub>21</sub> H <sub>30</sub> O <sub>5</sub>                  | 362.4599         | 1.79  | 5               | 3            | 2                   | 4         |

Table S3 The list of NPs accorded with Lipinski's rule of five.

| No. | UNPD ID    | Chemical Name             | Molecular Weight | ALogP | Num H Acceptors | Num H Donors | Num Rotatable Bonds | Num Rings |
|-----|------------|---------------------------|------------------|-------|-----------------|--------------|---------------------|-----------|
| 1   | UNPD133185 | Coniferyl alcohol         | 180.2            | 1.434 | 3               | 2            | 3                   | 1         |
| 2   | UNPD135865 | 3'-Hydroxy-4'-methoxy-4'- | 282.334          | 4.089 | 3               | 2            | 5                   | 2         |
| 3   | UNPD43533  | Nyasol                    | 252.308          | 4.105 | 2               | 2            | 4                   | 2         |
| 4   | UNPD68648  | 3''-Methoxyasparennydiol  | 296.317          | 3.954 | 4               | 2            | 6                   | 2         |
| 5   | UNPD77220  | Asparennydiol             | 266.291          | 3.971 | 3               | 2            | 5                   | 2         |
| 6   | UNPD96599  | 3''-Methoxynyasol         | 282.334          | 4.089 | 3               | 2            | 5                   | 2         |
